# Supplementary material for: Cross-linking of cyanide magnetic coordination polymers by rational insertion of formate, cyanide or azide
Source: Royal Society of Chemistry journal article supplement (doi:10.1039/c8dt01513a), 2018-01-01
Supplement: c8dt01513a1.pdf [file c8dt01513a1.pdf]

## Electronic Supplementary Information

# Cross-linking of cyanide magnetic coordination polymers by rational insertion of formate, cyanide or azide

Gabriela Handzlik, Barbara Sieklucka and Dawid Pinkowicz\*

### Table of contents

**Table S1.** Crystal structure solution and refinement parameters for **Mn<sub>2</sub>Nb** and the cross-linked networks **Mn<sub>2</sub>NbL**.

**Table S2.** Crystal structure solution and refinement parameters for **Mn<sub>2</sub>Mo** and the cross-linked networks **Mn<sub>2</sub>MoL**.

**Table S3.** The SHAPE parameters for the coordination spheres of Mn<sup>II</sup>, Nb<sup>IV</sup> and Mo<sup>IV</sup> in **Mn<sub>2</sub>Nb**, **Mn<sub>2</sub>Mo** and the cross-linked compounds **Mn<sub>2</sub>NbL** and **Mn<sub>2</sub>MoL**.

**Figure S1.** The topology of the 3-D cyanide-skeleton of **Mn<sub>2</sub>Nb**. Reproduced with permission from *Chem. Mater.* 2011, **23**, 21-31.

**Figure S2.** The asymmetric unit of **Mn<sub>2</sub>NbHCOO** with atom labeling scheme.

**Figure S3.** The asymmetric unit of **Mn<sub>2</sub>NbCN** with atom labeling scheme.

**Figure S4.** The asymmetric unit of **Mn<sub>2</sub>NbN<sub>3</sub>** with atom labeling scheme.

**Figure S5.** IR spectra of **Mn<sub>2</sub>Nb** (black), **Mn<sub>2</sub>NbHCOO** (green), **Mn<sub>2</sub>NbCN** (red) and **Mn<sub>2</sub>NbN<sub>3</sub>** (blue).

**Figure S6.** IR spectra of **Mn<sub>2</sub>Mo** (black), **Mn<sub>2</sub>MoHCOO** (green), **Mn<sub>2</sub>MoCN** (red) and **Mn<sub>2</sub>MoN<sub>3</sub>** (blue).

**Figure S7.** Experimental (colored lines) and simulated (gray lines) from RT single crystal XRD structure models PXRD patterns of **Mn<sub>2</sub>NbHCOO** (a), **MnNbCN** (b) and **MnNbN<sub>3</sub>** (c).

**Figure S8.** Experimental (colored lines) and simulated (gray lines) from RT single crystal XRD structure models PXRD patterns of **Mn<sub>2</sub>MoHCOO** (a), **MnMoCN** (b) and **MnMoN<sub>3</sub>** (c).

**Figure S9.** Temperature dependence of the AC magnetic susceptibility for **Mn<sub>2</sub>NbHCOO** (green), **Mn<sub>2</sub>NbCN** (red) and **Mn<sub>2</sub>NbN<sub>3</sub>** (blue) at 7, 70 and 700 Hz and  $H_{AC} = 0.1$  mT.

**Table S1.** Crystal structure solution and refinement parameters for **Mn<sub>2</sub>Nb** and the cross-linked networks **Mn<sub>2</sub>NbL**.

|                                                    | <b>Mn<sub>2</sub>Nb</b>                                                        | <b>Mn<sub>2</sub>NbHCOO</b>                                                    | <b>Mn<sub>2</sub>NbCN</b>                                                       | <b>Mn<sub>2</sub>NbN<sub>3</sub></b>                                            |
|----------------------------------------------------|--------------------------------------------------------------------------------|--------------------------------------------------------------------------------|---------------------------------------------------------------------------------|---------------------------------------------------------------------------------|
| <b>Formula</b>                                     | C <sub>8</sub> H <sub>16</sub> Mn <sub>2</sub> N <sub>8</sub> NbO <sub>8</sub> | C <sub>9</sub> H <sub>15</sub> Mn <sub>2</sub> N <sub>9</sub> NbO <sub>7</sub> | C <sub>9</sub> H <sub>13</sub> Mn <sub>2</sub> N <sub>11</sub> NbO <sub>3</sub> | C <sub>8</sub> H <sub>14</sub> Mn <sub>2</sub> N <sub>12</sub> NbO <sub>5</sub> |
| <b>Temperature, K</b>                              | 293(2)                                                                         | 293(2)                                                                         | 120(2)                                                                          | 170(2)                                                                          |
| <b>Diffractometer</b>                              | Nonius Kappa CCD                                                               | Nonius Kappa CCD                                                               | Agilent SuperNova                                                               | Bruker D8 Quest Eco Photon50 CMOS                                               |
| <b>λ [Å]</b>                                       | 0.71073 (Mo Kα)                                                                | 0.71073 (Mo Kα)                                                                | 0.71073 (Mo Kα)                                                                 | 0.71073 (Mo Kα)                                                                 |
| <b>Molecular weight, g/mol</b>                     | 554.87                                                                         | 563.88                                                                         | 525.88                                                                          | 560.87                                                                          |
| <b>Crystallographic system</b>                     | Tetragonal                                                                     | Tetragonal                                                                     | Tetragonal                                                                      | Tetragonal                                                                      |
| <b>Space group</b>                                 | <i>I4/m</i>                                                                    | <i>I4cm</i>                                                                    | <i>I4/mcm</i>                                                                   | <i>I4/m</i>                                                                     |
| <b>Unit cell</b>                                   | a = 12.091(5) Å<br>c = 13.387(5) Å                                             | a = 12.07320(10) Å<br>c = 13.4352(3) Å                                         | a = 11.83052(9) Å<br>c = 13.53251(18) Å                                         | a = 12.0837(3) Å<br>c = 13.3147(3) Å                                            |
| <b>Volume V, Å<sup>3</sup></b>                     | 1957.1(14)                                                                     | 1958.34(5)                                                                     | 1894.03(4)                                                                      | 1944.16(11)                                                                     |
| <b>Z</b>                                           | 1                                                                              | 4                                                                              | 2                                                                               | 16                                                                              |
| <b>Density ρ<sub>calc</sub>, g/cm<sup>3</sup></b>  | 1.897                                                                          | 1.862                                                                          | 1.799                                                                           | 1.828                                                                           |
| <b>F (000)</b>                                     | 1116                                                                           | 1056                                                                           | 984                                                                             | 1036                                                                            |
| <b>θ, deg</b>                                      | 2.27-34.97                                                                     | 3.37-28.29                                                                     | 3.010-28.589                                                                    | 27.632-3.060                                                                    |
| <b>Abs. coeff. μ, mm<sup>-1</sup></b>              | 1.899                                                                          | 1.862                                                                          | 1.940                                                                           | 1.886                                                                           |
| <b>Data/restraints/parameters</b>                  | 2241/5/68                                                                      | 1265/1/80                                                                      | 668/30/54                                                                       | 1190/0/71                                                                       |
| <b>R [ F<sub>o</sub> &gt; 4σ(F<sub>o</sub>) ]*</b> | R <sub>1</sub> = 0.032 (2060)<br>wR <sub>2</sub> = 0.0821 (2241)               | R <sub>1</sub> = 0.0295 (1157)<br>wR <sub>2</sub> = 0.0792 (1265)              | R <sub>1</sub> = 0.0199 (610)<br>wR <sub>2</sub> = 0.0561 (668)                 | R <sub>1</sub> = 0.0365 (1134)<br>wR <sub>2</sub> = 0.0844(1190)                |
| <b>GOF on F<sup>2</sup></b>                        | 1.139                                                                          | 1.047                                                                          | 1.176                                                                           | 1.120                                                                           |
| <b>max/min/resid. density, e·Å<sup>-3</sup></b>    | 2.436/-0.985/0.109                                                             | 1.192/-0.68/0.091                                                              | 0.496/-0.481/0.079                                                              | 1.790/-1.867/0.116                                                              |
| <b>Reflections collected</b>                       | 12293                                                                          | 13487                                                                          | 12366                                                                           | 9472                                                                            |
| <b>Unique reflection</b>                           | 2241                                                                           | 1265                                                                           | 668                                                                             | 1190                                                                            |
| <b>R<sub>int</sub></b>                             | 0.0256                                                                         | 0.059                                                                          | 0.0331                                                                          | 0.0240                                                                          |
| <b>Completeness, %</b>                             | 99.9                                                                           | 99.3                                                                           | 98.5                                                                            | 99.8                                                                            |

**Table S2.** Crystal structure solution and refinement parameters for **Mn<sub>2</sub>Mo** and the cross-linked networks **Mn<sub>2</sub>MoL**.

|                                                       | <b>Mn<sub>2</sub>Mo*</b>                                                       | <b>Mn<sub>2</sub>MoHCOO</b>                                                    | <b>Mn<sub>2</sub>MoCN</b>                                                       | <b>Mn<sub>2</sub>MoN<sub>3</sub></b>                                            |
|-------------------------------------------------------|--------------------------------------------------------------------------------|--------------------------------------------------------------------------------|---------------------------------------------------------------------------------|---------------------------------------------------------------------------------|
| <b>Formula</b>                                        | C <sub>8</sub> H <sub>16</sub> Mn <sub>2</sub> MoN <sub>8</sub> O <sub>8</sub> | C <sub>9</sub> H <sub>15</sub> Mn <sub>2</sub> MoN <sub>9</sub> O <sub>7</sub> | C <sub>9</sub> H <sub>13</sub> Mn <sub>2</sub> MoN <sub>11</sub> O <sub>3</sub> | C <sub>8</sub> H <sub>14</sub> Mn <sub>2</sub> MoN <sub>12</sub> O <sub>5</sub> |
| <b>Temperature, K</b>                                 | 298                                                                            | 293(2)                                                                         | 120(2)                                                                          | 120(2)                                                                          |
| <b>Diffractionmeter</b>                               |                                                                                | Bruker D8 Quest Eco<br>Photon50 CMOS                                           | Bruker D8 Quest Eco<br>Photon50 CMOS                                            | Bruker D8 Quest Eco<br>Photon50 CMOS                                            |
| <b>λ [Å]</b>                                          |                                                                                | 0.71073 (Mo Kα)                                                                | 0.71073 (Mo Kα)                                                                 | 0.71073 (Mo Kα)                                                                 |
| <b>Molecular weight, g/mol</b>                        | 558.08                                                                         | 567.09                                                                         | 529.09                                                                          | 564.09                                                                          |
| <b>Crystallographic system</b>                        | Tetragonal                                                                     | Tetragonal                                                                     | Tetragonal                                                                      | Tetragonal                                                                      |
| <b>Space group</b>                                    | <i>I4/m</i>                                                                    | <i>I4cm</i>                                                                    | <i>I4/mcm</i>                                                                   | <i>I4/m</i>                                                                     |
| <b>Unit cell</b>                                      | a = 11.894(5) Å<br>c = 13.236(3) Å                                             | a = 11.8998(4) Å<br>c = 13.2632(5) Å                                           | a = 11.6902(4) Å<br>c = 13.3582(6) Å                                            | a = 11.9694(3) Å<br>c = 13.1021(4) Å                                            |
| <b>Volume V, Å<sup>3</sup></b>                        | 1872.46                                                                        | 1878.14(14)                                                                    | 1825.54(15)                                                                     | 1877.09                                                                         |
| <b>Z</b>                                              | 4                                                                              | 4                                                                              | 4                                                                               | 4                                                                               |
| <b>Density ρ<sub>calc</sub>, g/cm<sup>3</sup></b>     | 1.98                                                                           | 1.956                                                                          | 1.878                                                                           | 1.989                                                                           |
| <b>Abs. coeff. μ, mm<sup>-1</sup></b>                 | 19.7                                                                           | 2.034                                                                          | 2.072                                                                           | 2.032                                                                           |
| <b>F (000)</b>                                        |                                                                                | 1064                                                                           | 989                                                                             | 1104                                                                            |
| <b>θ, deg</b>                                         |                                                                                | 3.912-27.627                                                                   | 3.050-27.520                                                                    | 3.404-28.252                                                                    |
| <b>Data/restraints/parameters</b>                     | 1183//67                                                                       | 1150/1/81                                                                      | 592/18/46                                                                       | 1220/11/93                                                                      |
| <b>R [F<sub>o</sub> &gt; 4σ(F<sub>o</sub>)]*</b>      | R <sub>1</sub> = 0.0809 (856)<br>wR <sub>2</sub> = 0.062 (1183)                | R <sub>1</sub> = 0.0229 (1071)<br>wR <sub>2</sub> = 0.0510 (1150)              | R <sub>1</sub> = 0.0265 (541)<br>wR <sub>2</sub> = 0.0583 (592)                 | R <sub>1</sub> = 0.0208 (1085)<br>wR <sub>2</sub> = 0.0476 (1220)               |
| <b>GOF on F<sup>2</sup></b>                           |                                                                                | 1.081                                                                          | 1.109                                                                           | 1.033                                                                           |
| <b>max/min/resid. density,<br/>[e·Å<sup>-3</sup>]</b> |                                                                                | 0.358/-0.402/0.069                                                             | 0.467/-0.644/0.099                                                              | 0.641/-0.430/0.076                                                              |
| <b>Reflections collected</b>                          | 1935                                                                           | 6713                                                                           | 9757                                                                            | 7342                                                                            |
| <b>Unique reflections</b>                             | 1183                                                                           | 1150                                                                           | 592                                                                             | 1220                                                                            |
| <b>R<sub>int</sub></b>                                |                                                                                | 0.0336                                                                         | 0.0452                                                                          | 0.0310                                                                          |
| <b>Completeness, %</b>                                |                                                                                | 99.2                                                                           | 99.8                                                                            | 99.1                                                                            |

\* J. M. Herrera, P. Franz, R. Podgajny, M. Pilkington, M. Biner, S. Decurtins, H. Stoeckli-Evans, A. Neels, R. Grade, Y. Dromzee, M. Julve, B. Sieklucka, K. Hashimoto, S. Ohkoshi, M. Verdaguer, C. R. *Chimie*, 2008, **11**, 1192

**Table S3.** The SHAPE parameters for the coordination spheres of Mn<sup>II</sup>, Nb<sup>IV</sup> and Mo<sup>IV</sup> in **Mn<sub>2</sub>Nb**, **Mn<sub>2</sub>Mo** and the cross-linked compounds **Mn<sub>2</sub>NbL** and **Mn<sub>2</sub>MoL**.

|                                      | S <sub>OC-6</sub> (O <sub>h</sub> ) for Mn <sup>II</sup> | S <sub>SAPR-8</sub> (D <sub>4d</sub> ) for Nb <sup>IV</sup> |
|--------------------------------------|----------------------------------------------------------|-------------------------------------------------------------|
| <b>Mn<sub>2</sub>Nb</b>              | 0.217                                                    | 0.131                                                       |
| <b>Mn<sub>2</sub>NbHCOO</b>          | 0.184                                                    | 0.095                                                       |
| <b>Mn<sub>2</sub>NbCN</b>            | 0.201                                                    | 0.127                                                       |
| <b>Mn<sub>2</sub>NbN<sub>3</sub></b> | 0.122                                                    | 0.085                                                       |
|                                      | S <sub>OC-6</sub> (O <sub>h</sub> ) for Mn <sup>II</sup> | S <sub>SAPR-8</sub> (D <sub>4d</sub> ) for Mo <sup>IV</sup> |
| <b>Mn<sub>2</sub>Mo</b>              | 0.388                                                    | 0.304                                                       |
| <b>Mn<sub>2</sub>MoHCOO</b>          | 0.154                                                    | 0.230                                                       |
| <b>Mn<sub>2</sub>MoCN</b>            | 0.170                                                    | 0.174                                                       |
| <b>Mn<sub>2</sub>MoN<sub>3</sub></b> | 0.145                                                    | 0.222                                                       |

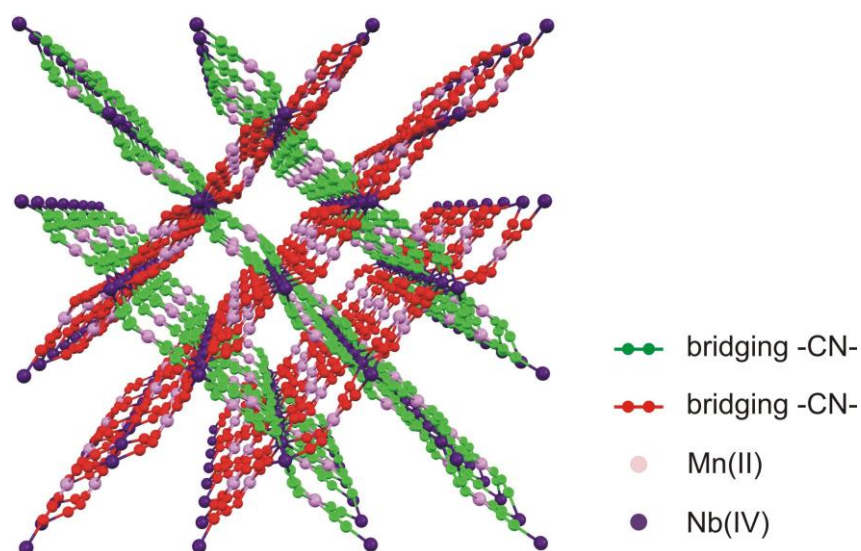

**Figure S1.** The topology of the 3-D cyanide-skeleton of **Mn<sub>2</sub>Nb**. Reproduced with permission from *Chem. Mater.* 2011, **23**, 21-31.

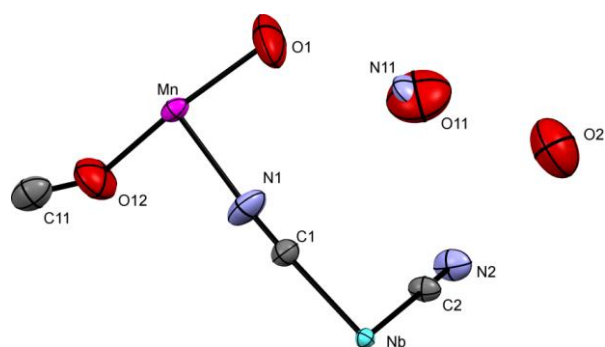

**Figure S2.** The asymmetric unit of **Mn<sub>2</sub>NbHCOO** with atom labeling scheme.

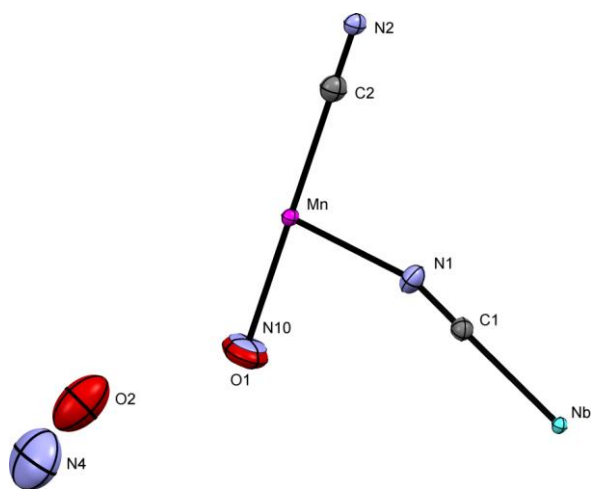

**Figure S3.** The asymmetric unit of  $\text{Mn}_2\text{NbcN}$  with atom labeling scheme.

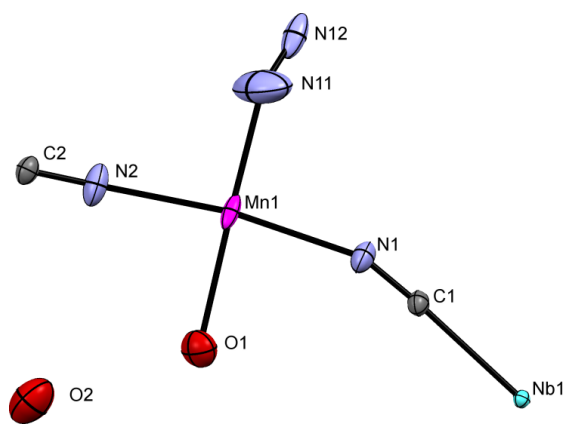

**Figure S4.** The asymmetric unit of  $\text{Mn}_2\text{NbN}_3$  with atom labeling scheme.

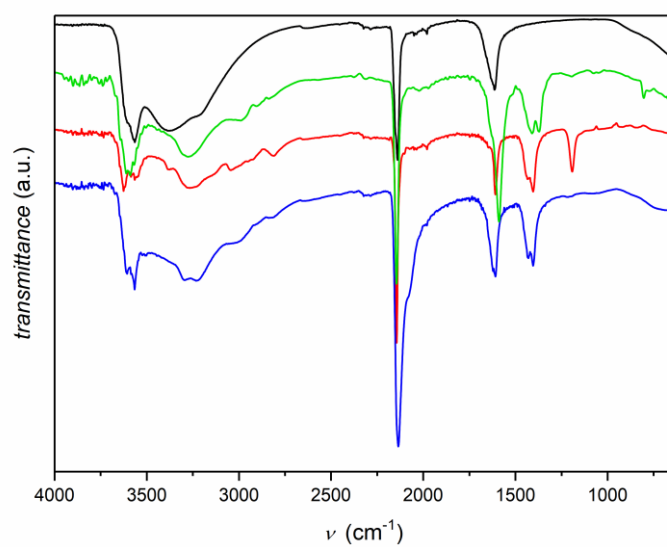

**Figure S5.** IR spectra of **Mn<sub>2</sub>Nb** (black), **Mn<sub>2</sub>NbHCOO** (green), **Mn<sub>2</sub>NbCN** (red) and **Mn<sub>2</sub>NbN<sub>3</sub>** (blue).

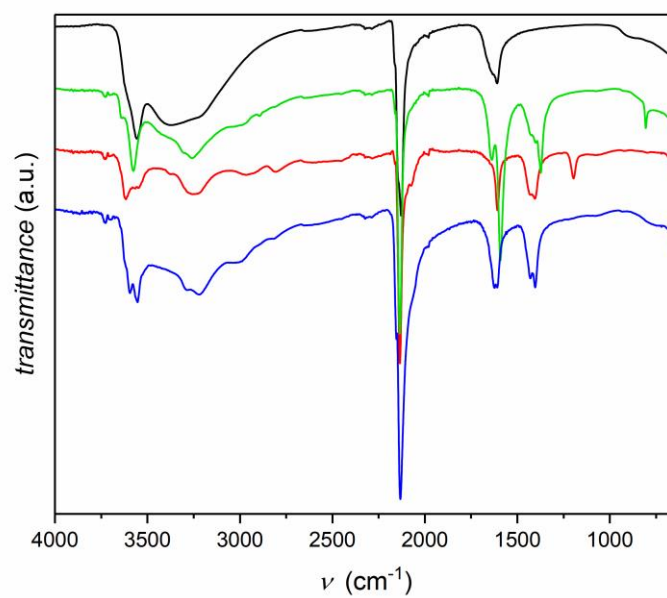

**Figure S6.** IR spectra of **Mn<sub>2</sub>Mo** (black), **Mn<sub>2</sub>MoHCOO** (green), **Mn<sub>2</sub>MoCN** (red) and **Mn<sub>2</sub>MoN<sub>3</sub>** (blue).

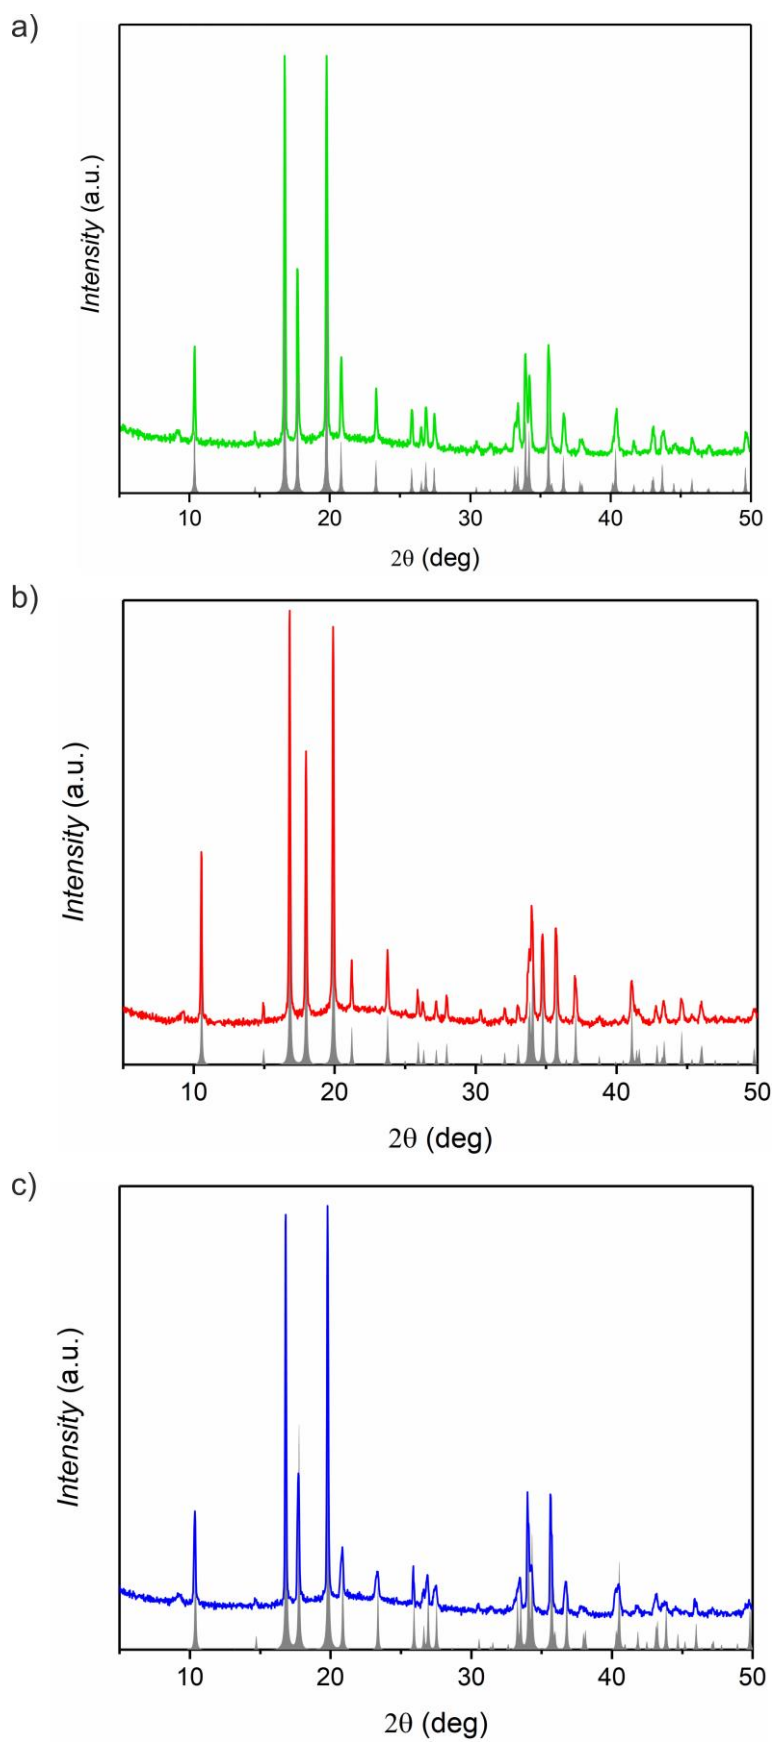

**Figure S7.** Experimental (colored lines) and simulated (gray lines) from RT single crystal XRD structure models PXRD patterns of  $\text{Mn}_2\text{NbHCOO}$  (a),  $\text{MnNbCN}$  (b) and  $\text{MnNbN}_3$  (c).

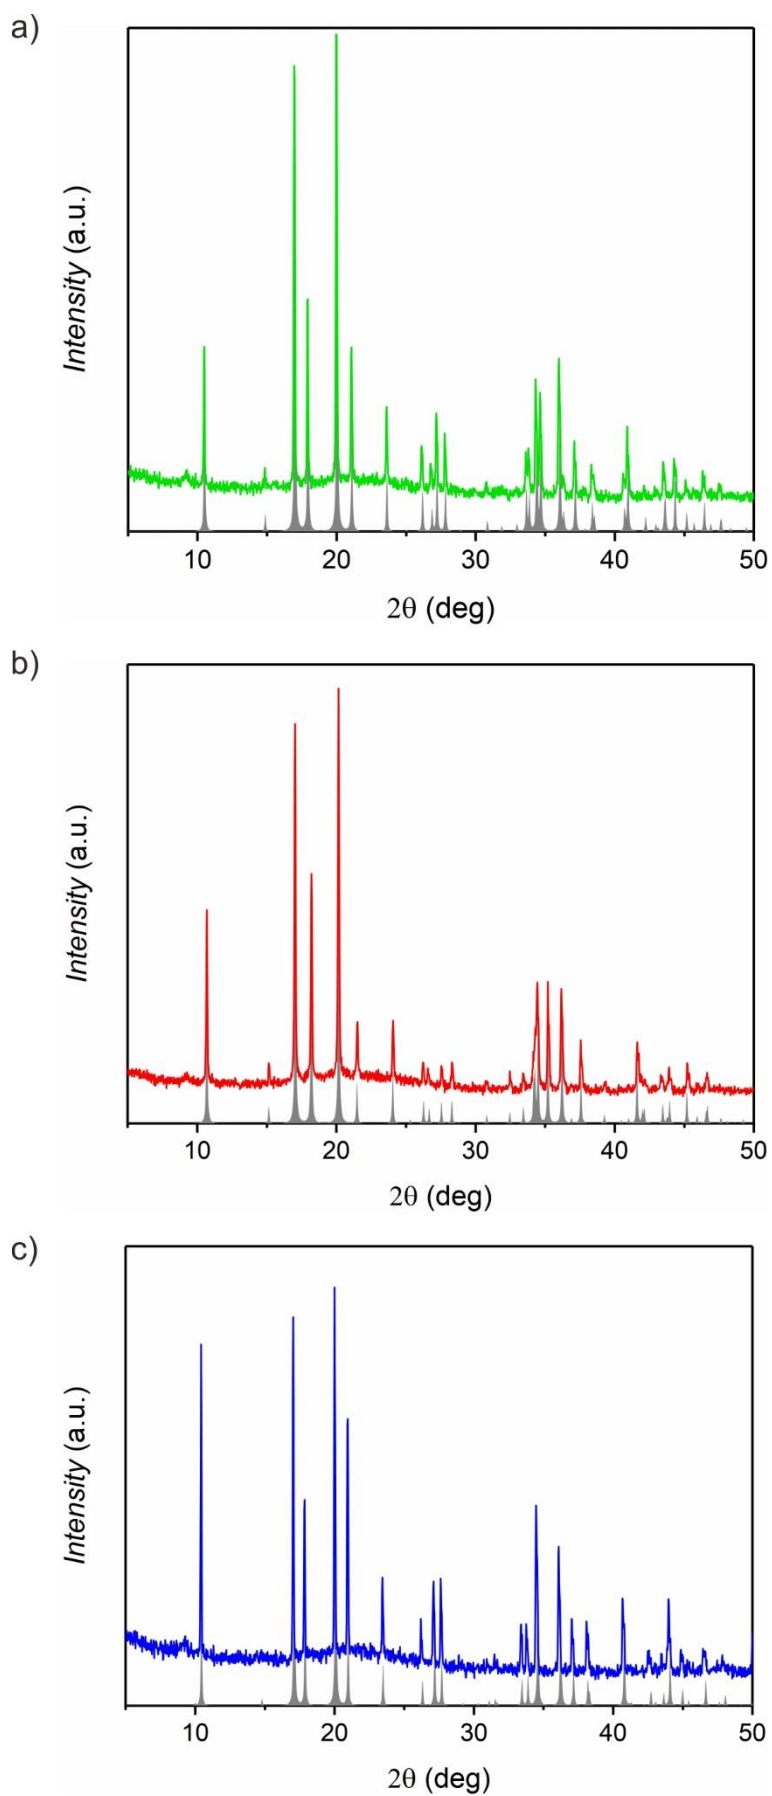

**Figure S8.** Experimental (colored lines) and simulated (gray lines) from RT single crystal XRD structure models PXRD patterns of **Mn<sub>2</sub>MoHCOO** (a), **MnMoCN** (b) and **MnMoN<sub>3</sub>** (c).



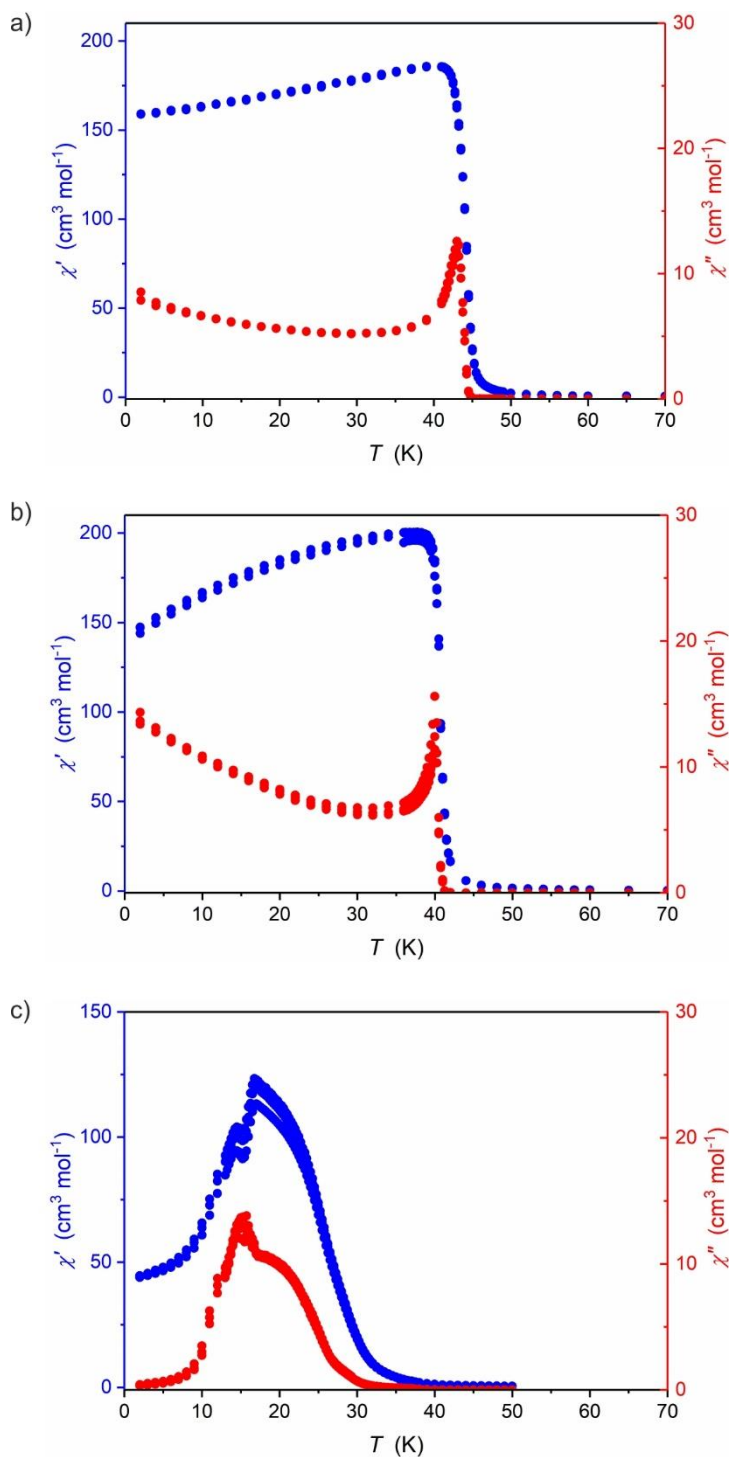

**Figure S9.** Temperature dependence of the AC magnetic susceptibility for  $\text{Mn}_2\text{NbHCOO}$  (a),  $\text{Mn}_2\text{NbCN}$  (b) and  $\text{Mn}_2\text{NbN}_3$  (c) at 7, 70 and 700 Hz and  $H_{\text{AC}} = 0.1$  mT.
